# Supplementary material for: Role of Dusp6 Phosphatase as a Tumor Suppressor in Non-Small Cell Lung Cancer
Source: MDPI journal article supplement (doi:10.3390/ijms20082036), 2019-04-25
Supplement: s1 [file s1]

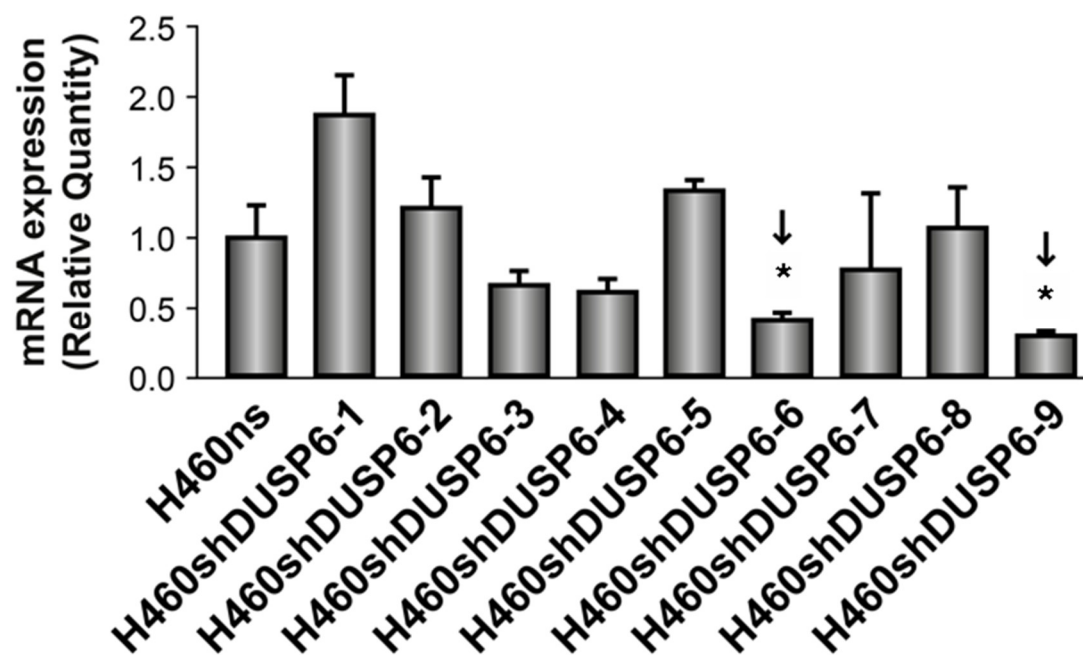

**Supplementary Figure S1: Expression of DUSP6 in H460 cells transduced with 9 different shRNAmir for human DUSP6.** H460 cells were transduced with nine lentiviral vectors described in Materials and Methods and 9 different clones were obtained and named H460shDUSP6-1 to H460shDUSP6-9. Expression levels of DUSP6 were determined by RT-QPCR using H460ns as a reference and GAPDH as control for expression. Statistical significance indicated by asterisks

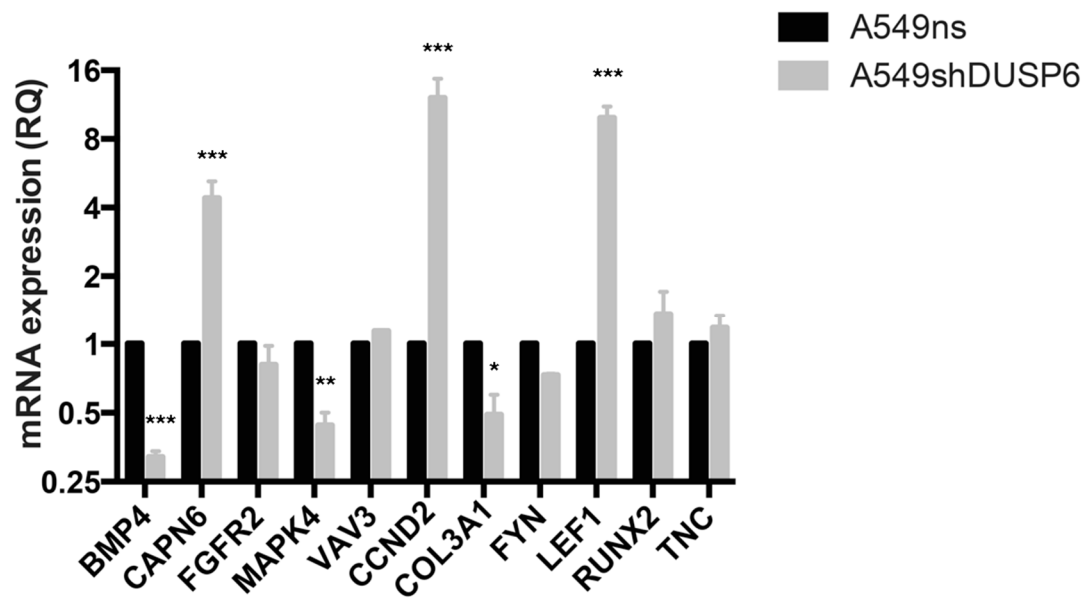

**Supplementary Figure S2. RNA-seq validation by qRT-PCR in DUSP6 depleted A549 cells, of selected genes (in bold genes Table B).** Data were normalized to  $\beta$ -actin levels and are shown as mean  $\pm$  s.d. of three independent experiments. Statistical significance indicated by asterisks
